## Which single echo parameter is the best marker of left ventricular filling pressure?

F. Khan<sup>1</sup>, K. Inoue<sup>2</sup>, E.W. Remme<sup>1</sup>, O.S. Andersen<sup>1</sup>, E. Gude<sup>1</sup>, H. Skulstad<sup>1</sup>, M. Chetrit<sup>3</sup>, E. Garcia-Izquierdo Jaen<sup>4</sup>, J.W. Ha<sup>5</sup>, A.L. Klein<sup>3</sup>, S. Kikuchi<sup>6</sup>, N. Ohte<sup>6</sup>, S.F. Nagueh<sup>7</sup>, O.A. Smiseth<sup>1</sup>

<sup>1</sup>Oslo University Hospital Rikshospitalet, Oslo, Norway; <sup>2</sup>Ehime University Graduate School of Medicine, Department of Cardiology, Pulmonology, Hypertension & Nephrology, Ehime, Japan; <sup>3</sup>Cleveland Clinic, Cleveland, United States of America; <sup>4</sup>University Hospital Puerta de Hierro Majadahonda, Madrid, Spain; <sup>5</sup>Yonsei University College of Medicine, Seoul, Korea (Republic of); <sup>6</sup>Nagoya University Graduate School of Medicine, Nagoya, Japan; <sup>7</sup>The Methodist Hospital, Houston, United States of America

On behalf of Integrated CardioVascular Function

**Funding Acknowledgement:** Type of funding source: Public Institution(s). Main funding source(s): South-Eastern Norway Regional Health Authority

**Background:** Estimation of left ventricular filling pressure (LVFP) is highly relevant in clinical practice. Invasive pressure remains the gold standard, but a number of echocardiographic parameters that correlate with LVFP are used as non-invasive markers of pressure.

**Purpose:** We investigated how different echocardiographic parameters correlated with invasively measured LVFP, and how accurately those parameters could differentiate between normal or elevated LVFP.

**Method:** We performed a prospective, multicenter, multinational and multivendor study in an all comer population of 322 patients with suspected heart failure or other cardiovascular disease. 194 patients had EF  $\geq 50\%$  and 129 had EF  $< 50\%$ . LVFP was measured by right- or left heart catheterization, as pulmonary capillary wedge pressure or pre-A LV diastolic pressure, respectively.

When excluding all special patient populations defined in the 2016 recommendations for echocardiographic evaluation of LV diastolic function, 213 patients remained. Of these 135 had EF  $\geq 50\%$  and 74 had EF  $< 50\%$ .

Echocardiography was performed within 1 day of catheterization. Previ-

ously recommended cut-off values for established parameters were used to determine the accuracy of classifying LVFP as normal or elevated. For left atrial (LA) reservoir strain, based on ROC analysis, a cut-off value of  $< 18\%$  was used as marker of elevated LVFP.

**Results:** LA reservoir strain and the ratio of peak mitral early flow velocity (E) and LA reservoir strain (E/LA strain) showed the best correlations to LVFP (Table 1, Figure 1). They also had the highest accuracy, 75% for both, in classifying LVFP as normal or elevated in the whole patient population. E/LA reservoir strain provided no additional diagnostic value to using LA reservoir strain alone.

In HFpEF patients accuracy was essentially similar for LA strain, E/LA strain and E/e', whereas in HFrEF patients the two former tended to be better than E/e'.

**Conclusion:** Parameters containing LA reservoir strain showed the best correlation to LVFP. This indicates that LA reservoir strain may have a role in evaluation of LVFP.

Table 1

| Echo parameter        | Correlation to LVFP (r-value) | Cut-off value for elevated LVFP | Accuracy in whole population | Accuracy without special populations |
|-----------------------|-------------------------------|---------------------------------|------------------------------|--------------------------------------|
| E/LA reservoir strain | 0.61*                         | $> 4.1$                         | 75%                          | 74%                                  |
| LA reservoir strain   | -0.58*                        | $< 18\%$                        | 75%                          | 73%                                  |
| E/e'                  | 0.45*                         | $> 14$                          | 68%                          | 70%                                  |
| LA volume             | 0.36*                         | $> 34\text{ml/m}^2$             | 68%                          | 67%                                  |
| GLS                   | -0.50*                        | $< 16\%$                        | 63%                          | 64%                                  |
| TR velocity           | 0.25*                         | $> 2.8\text{m/s}$               | 62%                          | 69%                                  |

\*p<0.001.

**Figure 1** Correlation between LA reservoir strain and LVFP in whole population. The coloured area shows patients that were correctly classified using a cut-off value of  $< 18\%$  for LA reservoir strain as a marker for elevated LVFP.

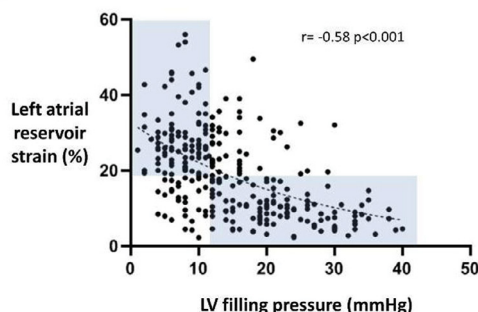

Source: http://academic.oup.com/eurheartj/article-pdf/41/Supplement_2/ehaa946.0050/34513828/ehaa946.0050.pdf
